# Supplementary material for: Highly dispersive Co3O4nanoparticles incorporated into a cellulose nanofiber for a high-performance flexible supercapacitor
Source: Royal Society of Chemistry journal article supplement (doi:10.1039/d0nr06982e), 2020-12-11
Supplement: d0nr06982e1.pdf [file d0nr06982e1.pdf]

## Supplementary Information

### Highly dispersive $\text{Co}_3\text{O}_4$ nanoparticles incorporated in a cellulose nanofiber for a high performance flexible supercapacitor

Iqra Rabani<sup>a</sup>, Jeseung Yoo<sup>a</sup>, Hyo-Sun Kim<sup>a</sup>, Do Van Lam<sup>b</sup>, Sajjad Hussain<sup>a</sup>, K. Karuppasamy<sup>c</sup>  
and Young-Soo Seo<sup>a\*</sup>

<sup>a</sup>Department of Nanotechnology and Advanced Materials Engineering, Sejong University, Seoul 05006, Republic of Korea.

<sup>b</sup>Department of Applied Nanomechanics, Korea Institute of Machinery and Materials, Daejeon 34103, Republic of Korea

<sup>c</sup>Division of Electronics and Electrical Engineering, Dongguk University-Seoul, Seoul 04620, Republic of Korea.

\*Corresponding author: Prof. Young-Soo Seo; E-mail: [ysseo@sejong.ac.kr](mailto:ysseo@sejong.ac.kr)

## Content

### S1. Characterizations

**Figure S2.** Elemental mapping for the 1D Co<sub>3</sub>O<sub>4</sub>@CNF hybrid.

**Figure S3.** Cyclic voltammetry (CV) at different scan rates using 3 M KOH electrolyte within voltage window from -0.2 V to +0.6 V for **(a)** 1D Co<sub>3</sub>O<sub>4</sub>@CNF1 hybrid, **(b)** 1D Co<sub>3</sub>O<sub>4</sub>@CNF3 hybrid.

**Figure S4.** Charging/discharging (GCD) curves at current densities for **(a)** 1D Co<sub>3</sub>O<sub>4</sub>@CNF1 hybrid and **(b)** 1D Co<sub>3</sub>O<sub>4</sub>@CNF3 hybrid.

**Figure S5.** CV curves using 3 M KOH electrolyte at different scan rates within voltage window from -0.2 V to +0.6 V of **(a)** pristine Co<sub>3</sub>O<sub>4</sub> nanoparticles **(b)** pristine CNF.

**Figure S6.** GCD curves at current densities with voltage window from -0.2 V to +0.6 V for **(a)** pristine Co<sub>3</sub>O<sub>4</sub> nanoparticles **(b)** pristine CNF.

**Figure S7.** CV curves using 3 M KOH electrolyte at different scan rates within voltage window from 0 V to 1 V of **(a)** pristine Co<sub>3</sub>O<sub>4</sub> nanoparticles and **(b)** pristine CNF.

**Figure S8.** GCD curves at current densities with voltage window from 0 V to 1 V for **(a)** pristine Co<sub>3</sub>O<sub>4</sub> nanoparticles and **(b)** pristine CNF.

**Figure S9.** Energy density with respect to the power density plot at the different current sweep rates.

### S10. Energy density and power density calculations by the non-linear discharging curve

**Figure S11.** Ragone plot using integrated discharging formula.

**Figure S12(a-b).** FESEM images of the 1D Co<sub>3</sub>O<sub>4</sub>@CNF flexible paper like film.

**Figure S13.** EDX spectrum of the 1D Co<sub>3</sub>O<sub>4</sub>@CNF flexible paper like film.

**Figure S14.** Stability curve of the 1D Co<sub>3</sub>O<sub>4</sub>@CNF flexible paper over the 50<sup>th</sup> cycle at the bending state.

**Table S1.** Comparative Electrochemical Performance of 1D Co<sub>3</sub>O<sub>4</sub>@CNF in the Three-Electrode System with Other Previously Reported Materials.

**Table S2.** Comparative Electrochemical Performance of 1D Co<sub>3</sub>O<sub>4</sub>@CNF in the Two-Electrode System with Other Previously Reported Symmetric and Asymmetric Materials.

**References**

## **S1. Characterizations**

The surface morphology of the as prepared (1D Co<sub>3</sub>O<sub>4</sub>@CNF hybrid, CNF and Co<sub>3</sub>O<sub>4</sub>) was analyzed using field emission scanning electron microscopy (FESEM; (JEOL JSM-6700F )) and transmission electron microscopy (TEM; (FEI Tecnai F30 S-TWIN TEM)). To TEM, sample were prepared by means of adding few drops of ethanol with samples and ultrasonically sonicated for about 1 min. Then, 0.3 μ/ml was dropped over carbon grid and arid into the vacuum oven for 1 hour. Compositional analysis was performed by using energy dispersive X-rays (EDX) technique operating at 5 kV and 10 keV. The sample was prepared for the EDX analysis by means of adding 0.3 μ/ml of diluted sample on the aluminum sheet and dried into the vacuum oven. X-ray diffraction (XRD; D/Max-2550 PC Rigaku Co., Korea, Cu Kα, λ = 1.5406 Å) and Raman spectroscopy (in Via-Reflex, Renishaw, Co., South Korea) analyses were employed to study the crystallinity structure and phase of all samples. X-ray photoelectron spectroscopy (XPS) were carried out using a Thermo Scientific ESCALAB 250Xi X-ray source to obtain the elemental composition, respectively. Moreover, the surface properties were measured using the Brunauer–Emmett–Teller (BET) N<sub>2</sub> adsorption-desorption isotherm by an automated adsorption system (ASAP-2020). The samples were first degassed followed by preconditioning the samples at 150 °C for 3 hours for the BET analysis. The powder sample was used for all techniques except of the EDX and TEM analyses.

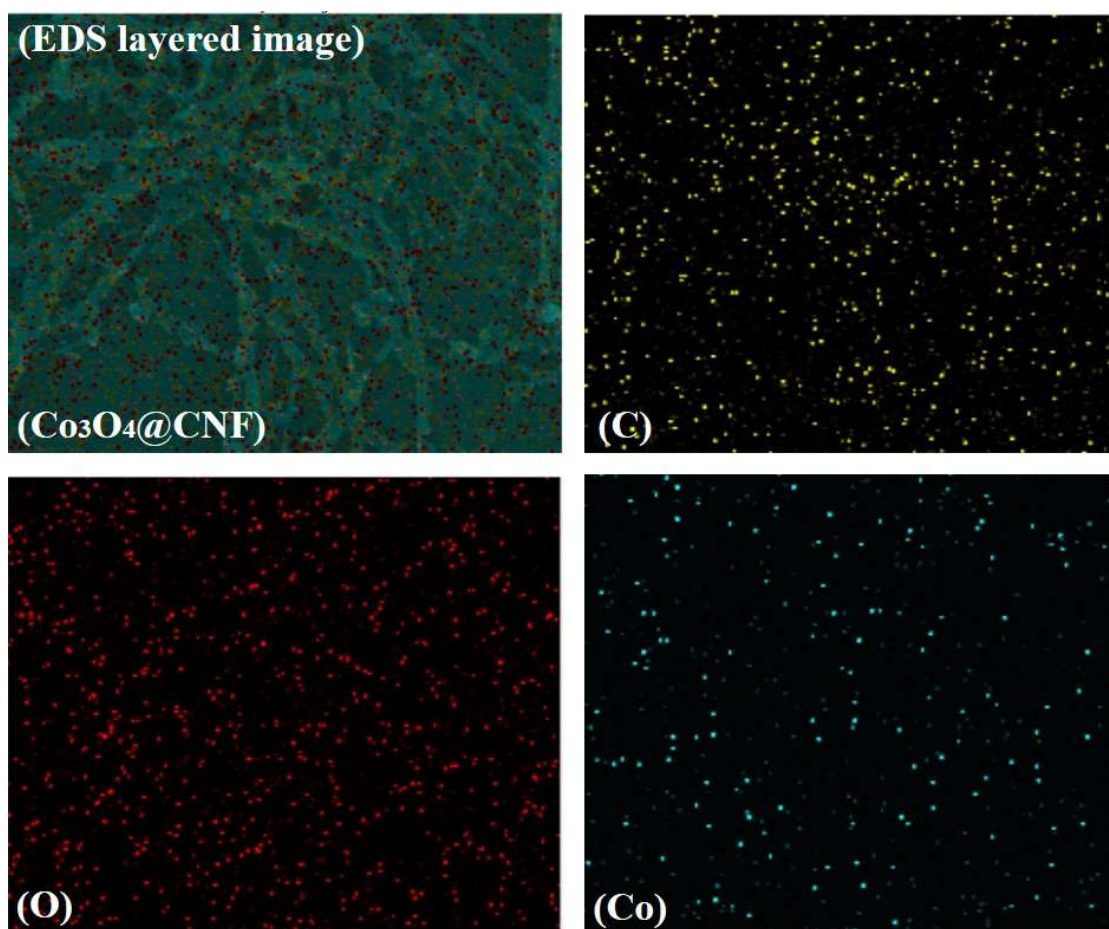

**Figure S2.** Elemental mapping for the 1D Co<sub>3</sub>O<sub>4</sub>@CNF hybrid.

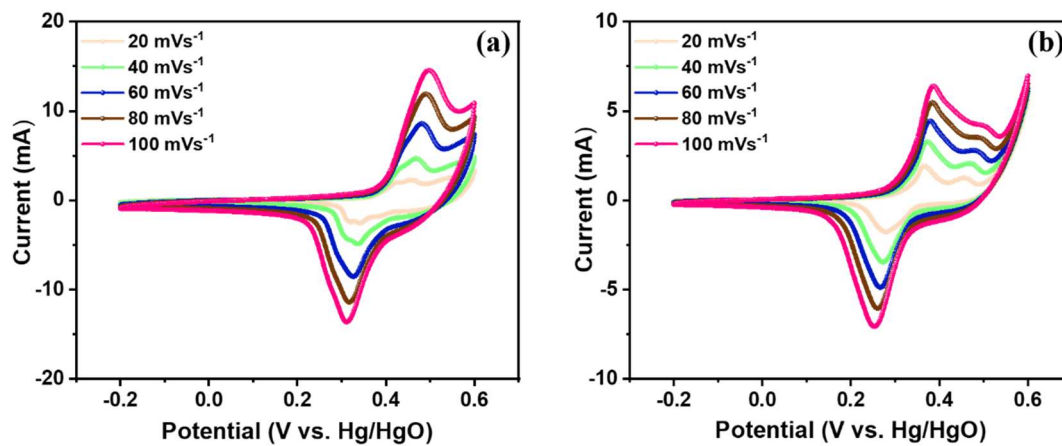

**Figure S3.** Cyclic voltammetry (CV) at different scan rates using 3 M KOH electrolyte within voltage window from -0.2 V to +0.6 V for **(a)** 1D Co<sub>3</sub>O<sub>4</sub>@CNF1 hybrid, **(b)** 1D Co<sub>3</sub>O<sub>4</sub>@CNF3 hybrid.

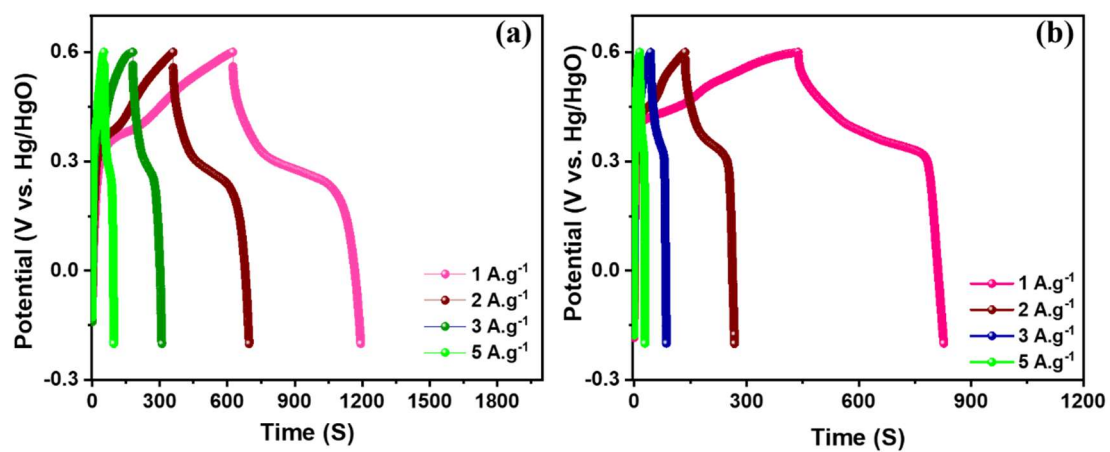

**Figure S4.** Charging/discharging (GCD) curves at current densities for (a) 1D Co<sub>3</sub>O<sub>4</sub>@CNF1 hybrid and (b) 1D Co<sub>3</sub>O<sub>4</sub>@CNF3 hybrid.

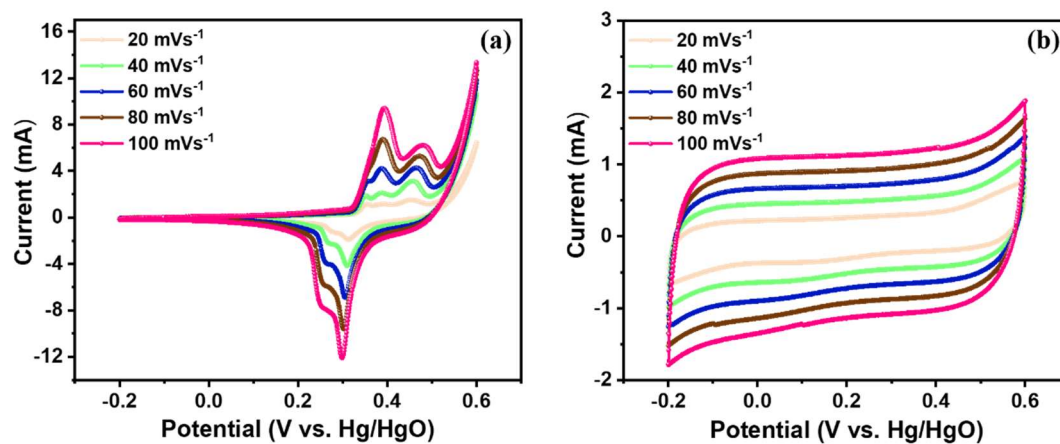

**Figure S5.** CV curves using 3 M KOH electrolyte at different scan rates within voltage window from -0.2 V to +0.6 V of **(a)** pristine  $\text{Co}_3\text{O}_4$  nanoparticles **(b)** pristine CNF.



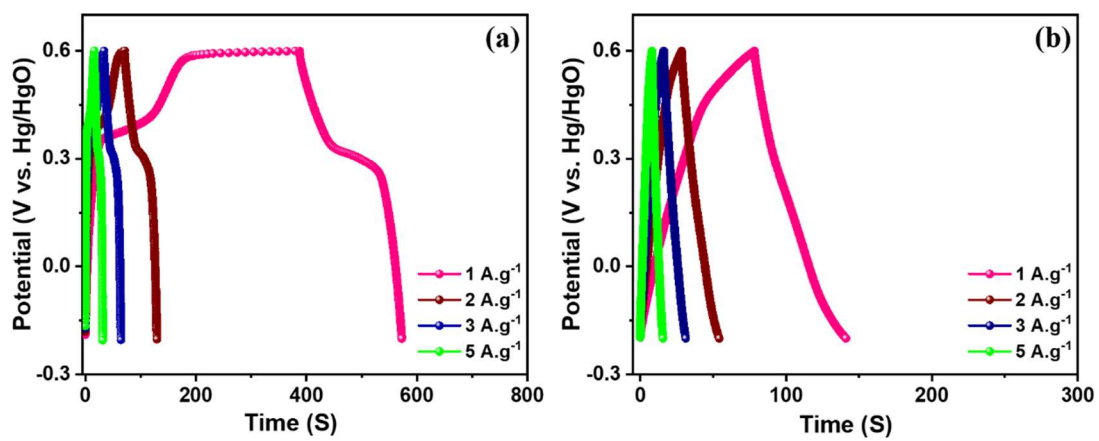

**Figure S6.** GCD curves at current densities with voltage window from -0.2 V to +0.6 V for **(a)** pristine  $\text{Co}_3\text{O}_4$  nanoparticles **(b)** pristine CNF.

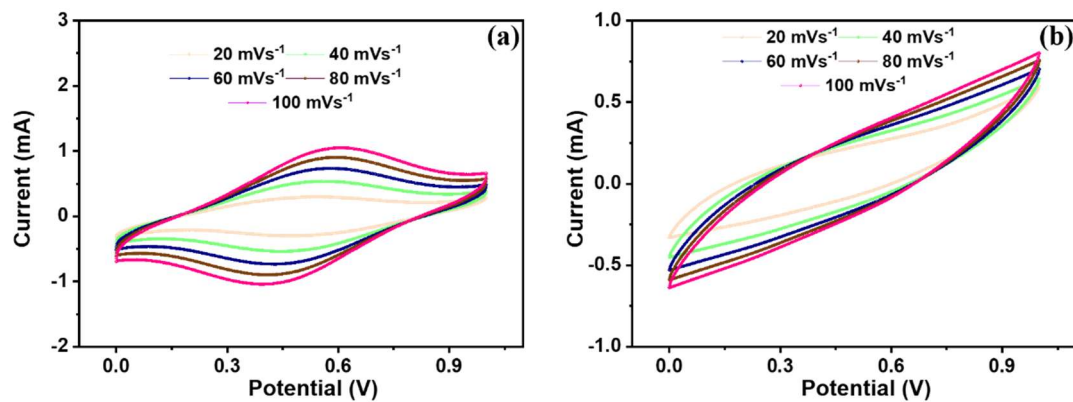

**Figure S7.** CV curves using 3 M KOH electrolyte at different scan rates within voltage window from 0 V to 1 V of **(a)** pristine  $\text{Co}_3\text{O}_4$  nanoparticles and **(b)** pristine CNF.

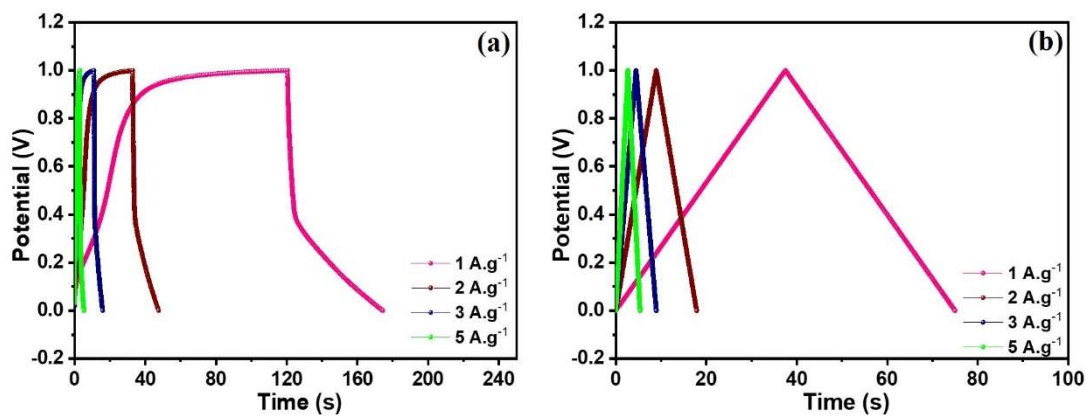

**Figure S8.** GCD curves at current densities with voltage window from 0 V to 1 V for **(a)** pristine Co<sub>3</sub>O<sub>4</sub> nanoparticles and **(b)** pristine CNF.

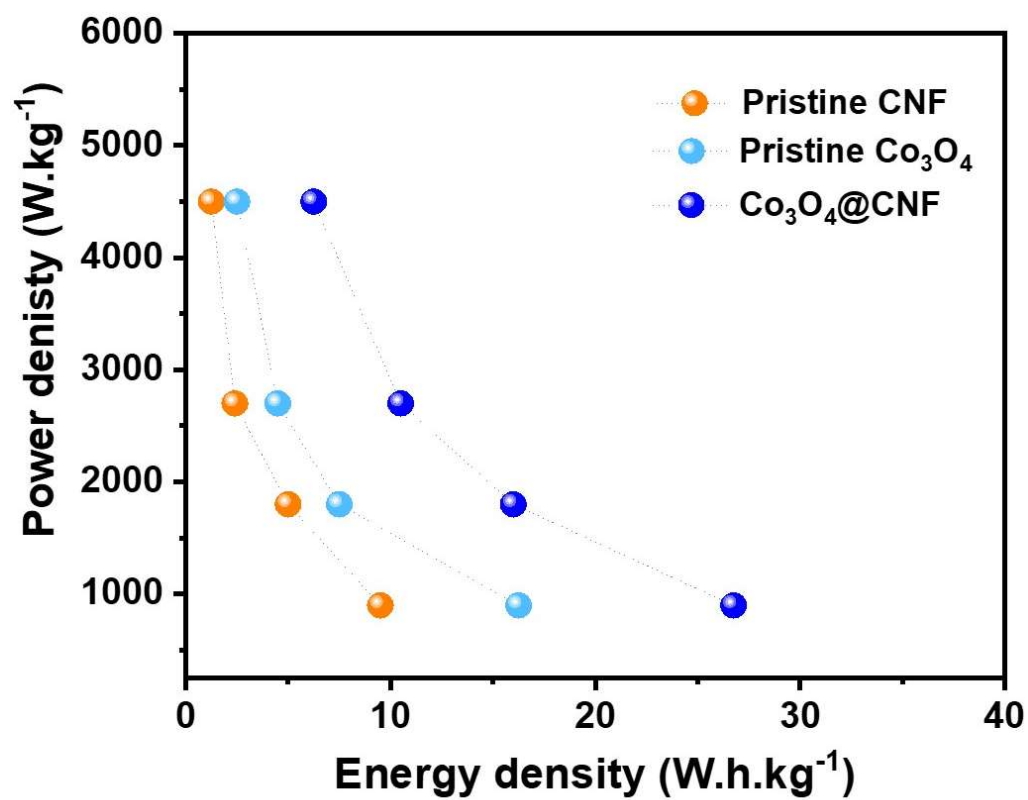

**Figure S9.** Energy density with respect to the power density plot at the different current sweep rates.

### S10. Energy density and power density calculations by the non-linear discharging curve

The energy density (E), and power density (P) of SSCs cells were determined using the following equations:

$$E = \frac{1}{m} \int_0^{t_d} iV dt \quad \text{----- Equation 1}$$

$$P = \frac{E}{t_d} \quad \text{----- Equation 2}$$

Where  $\Delta V$  is the voltage window, m is the mass of active electrode material,  $t_d$  is the discharging time, and i is the loading current density. We investigated the Ragone plot using the integrated discharging curve as can be seen below.

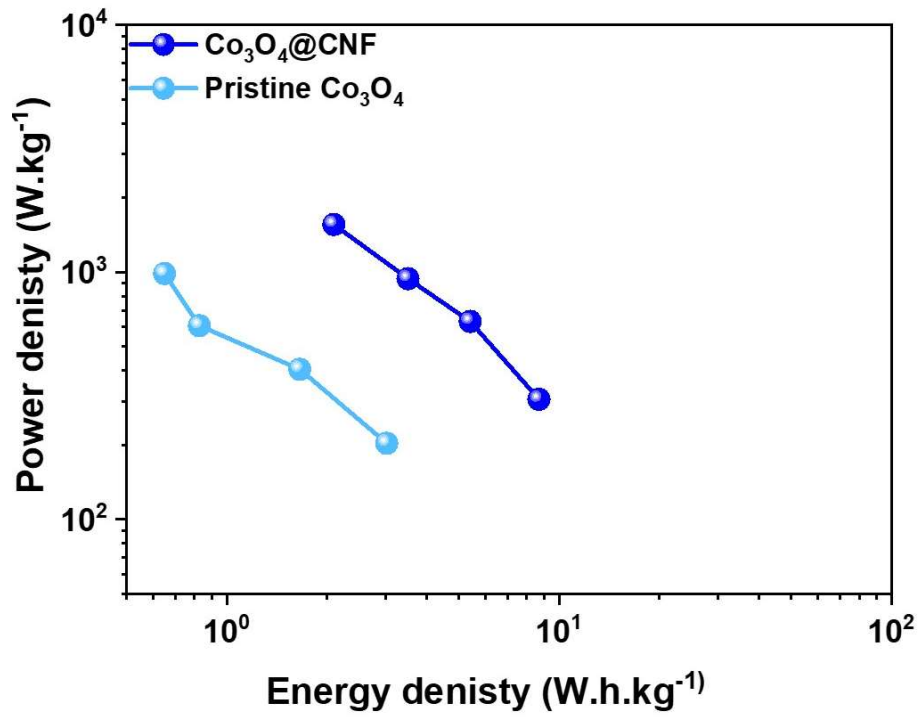

Figure S11. Ragone plot using integrated discharging formula.

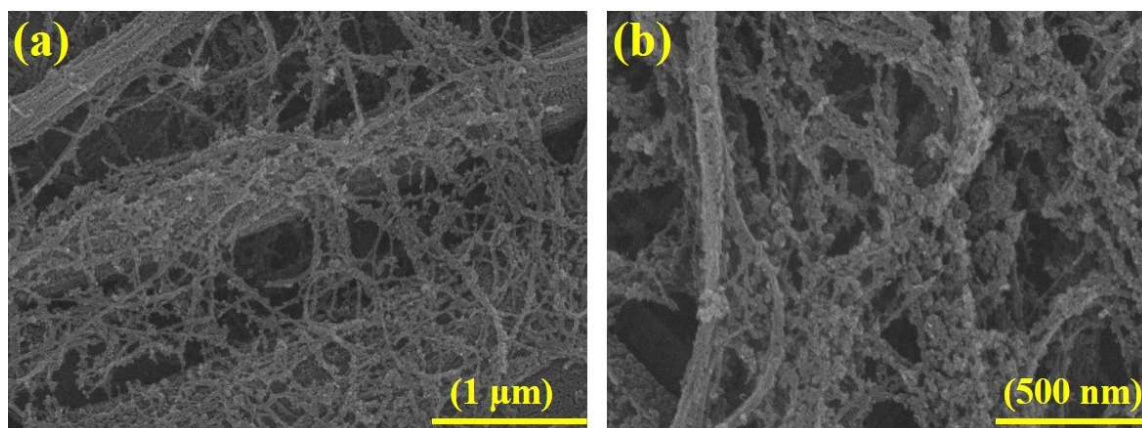

**Figure S12(a-b).** FESEM images of the 1D  $\text{Co}_3\text{O}_4@\text{CNF}$  flexible paper like film.

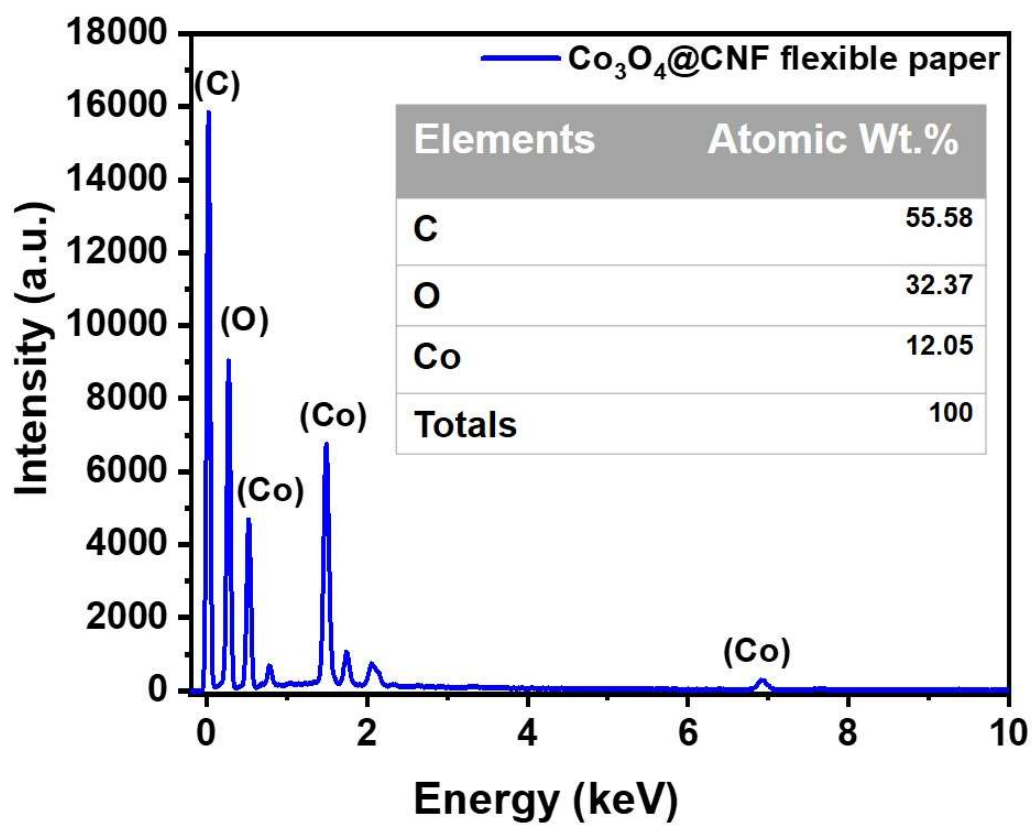

Figure S13. EDX spectrum of the 1D  $\text{Co}_3\text{O}_4$ @CNF flexible paper like film.



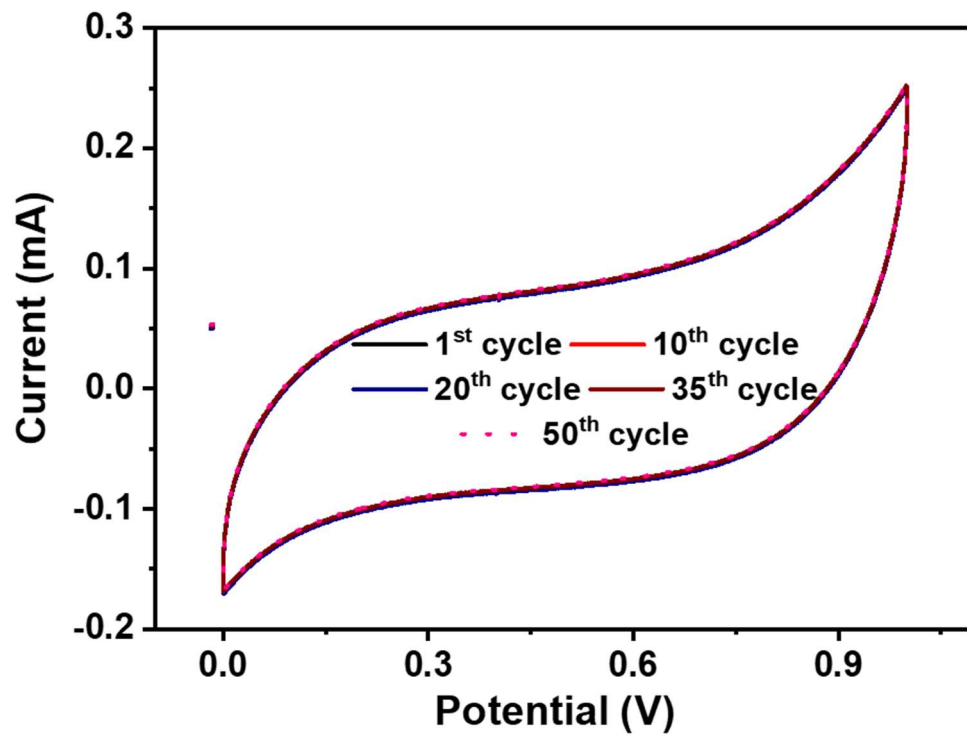

**Figure S14.** Stability curve of the 1D Co<sub>3</sub>O<sub>4</sub>@CNF flexible paper over the 50<sup>th</sup> cycle at the bending state.

**Table S1.** Comparative Electrochemical Performance of 1D Co<sub>3</sub>O<sub>4</sub>@CNF in the Three-Electrode System with Other Previously Reported Materials.

| Electrode materials                                  | Voltage window  | Electrolyte                           | Specific capacitance                              | Ref.    |
|------------------------------------------------------|-----------------|---------------------------------------|---------------------------------------------------|---------|
| 1D Co <sub>3</sub> O <sub>4</sub> @CNF               | -0.2 to 0.6 V   | 3 M KOH                               | 789 F·g <sup>-1</sup> at 1 A·g <sup>-1</sup>      | present |
| yolk shell-CuCo <sub>2</sub> Se <sub>4</sub>         | -0.2 to 0.5 V   | 3 M KOH                               | 512 F·g <sup>-1</sup> at 1 A·g <sup>-1</sup>      | [1]     |
| Co <sub>3</sub> O <sub>4</sub> nanocrystals          | -0.2 to 0.6 V   | 6 M KOH                               | 284 F·g <sup>-1</sup> at 1 A·g <sup>-1</sup>      | [2]     |
| Mn-Co sulfide nano sheets                            | 0 to 0.65 V     | 2 M KOH                               | 1.724 F cm <sup>-2</sup> at 1 mA cm <sup>-2</sup> | [3]     |
| Porous MnCo <sub>2</sub> O <sub>4.5</sub>            | -0.2 to 0.6 V   | 2 M KOH                               | 342 F·g <sup>-1</sup> at 0.5 A·g <sup>-1</sup>    | [4]     |
| porous Co <sub>3</sub> O <sub>4</sub>                | 0 to 0.43 V     | 3 M KOH                               | 342.1 F·g <sup>-1</sup> at 1 A·g <sup>-1</sup>    | [5]     |
| Co <sub>9</sub> S <sub>8</sub> @N-C@MoS <sub>2</sub> | 0 to 0.6 V      | 3 M KOH                               | 410 F·g <sup>-1</sup> at 1 A·g <sup>-1</sup>      | [6]     |
| Co <sub>3</sub> O <sub>4</sub> @N-rGO                | -0.1 to 0.4 V   | 3 M KOH                               | 450 F·g <sup>-1</sup> at 1 A·g <sup>-1</sup>      | [7]     |
| NiCo <sub>2</sub> S <sub>4</sub>                     | 0 to 0.6 V      | 1 M KOH                               | 464 F·g <sup>-1</sup> at 1 A·g <sup>-1</sup>      | [8]     |
| NiCo <sub>2</sub> O <sub>4</sub>                     | 0 to 0.6 V      | 1 M KOH                               | 173 F·g <sup>-1</sup> at 1 A·g <sup>-1</sup>      | [9]     |
| MnO <sub>2</sub> /MnCo <sub>2</sub> O <sub>4</sub>   | 0 to 0.6 V      | 2 M KOH                               | 497 F·g <sup>-1</sup> at 1 A·g <sup>-1</sup>      | [10]    |
| NCA/Co <sub>3</sub> O <sub>4</sub>                   | -0.05 to 0.45 V | 6 M KOH                               | 616 F·g <sup>-1</sup> at 1.2 A                    | [10]    |
| CuCo <sub>2</sub> S <sub>4</sub> /CNT/graphene       | 0 to 0.6 V      | 1 M Na <sub>2</sub> SO <sub>4</sub>   | 504 F·g <sup>-1</sup> at 10 A·g <sup>-1</sup>     | [11]    |
| CPSC-3rGO                                            | -0.2 to 0.8 V   | 0.2 M Na <sub>2</sub> SO <sub>4</sub> | 446 F·g <sup>-1</sup> at 1 A·g <sup>-1</sup>      | [12]    |
| Co <sub>9</sub> S <sub>8</sub> @Ni (OH) <sub>2</sub> | 0 to 0.5 V      | 6 M KOH                               | 149.44 mA h g <sup>-1</sup> at 1Ag <sup>-1</sup>  | [13]    |
| CoS <sub>x</sub> @carbon core-shell                  | 0 to 0.4 V      | 6 M KOH                               | 496 F·g <sup>-1</sup> at 0.5 A·g <sup>-1</sup>    | [14]    |
| petal-like cobalt selenide                           | -0.1 to 0.65 V  | 2 M KOH                               | 294 F·g <sup>-1</sup> at 0.5 A·g <sup>-1</sup>    | [15]    |
| Co <sub>3</sub> O <sub>4</sub> nanoflakes@SrGO       | -0.2 to 0.5 V   | 2 M KOH                               | 406 F·g <sup>-1</sup> at 1 A·g <sup>-1</sup>      | [16]    |
| CoMoO <sub>4</sub> nanoclusters                      | -0.9 to 0.6 V   | 6.0 M KNO <sub>3</sub>                | 367 F·g <sup>-1</sup> at 1.2 A·g <sup>-1</sup>    | [17]    |
| Ni-Co selenide                                       | 0 to 0.6 V      | 6 M KOH                               | 742.4 F·g <sup>-1</sup> at 1 mA cm <sup>-2</sup>  | [18]    |
| NiCo <sub>2</sub> O <sub>4</sub>                     | -0.2 to 0.6 V   | 6 M KOH                               | 225 C. g <sup>-1</sup> at 0.5 A g <sup>-1</sup>   | [19]    |

**Table S2.** Comparative Electrochemical Performance of 1D Co<sub>3</sub>O<sub>4</sub>@CNF in the Two-Electrode System with Other Previously Reported Symmetric and Asymmetric Materials.

| Electrode materials                                            | Type       | Electrolyte                         | Specific capacitance                                | Capacitance retention (%) / cycles | Ref.    |
|----------------------------------------------------------------|------------|-------------------------------------|-----------------------------------------------------|------------------------------------|---------|
| Co <sub>3</sub> O <sub>4</sub> @CNF                            | Symmetric  | 3.0 M KOH                           | 214 F·g <sup>-1</sup> @ 1.0 A·g <sup>-1</sup>       | 94/5000                            | Present |
| CoNW/CF//CoNW/CF SSC                                           | Symmetric  | 3.0 M KOH                           | 517.33 mF/cm <sup>3</sup> @ 0.26 mA/cm <sup>2</sup> | 95/5000                            | [20]    |
| NCOs                                                           | Symmetric  | 1.0 M KOH                           | 89 F g <sup>-1</sup> @ 0.23 A.g <sup>-1</sup>       | -                                  | [21]    |
| CNF-RGO                                                        | Symmetric  | H <sub>2</sub> SO <sub>4</sub> -PVA | 203 F g <sup>-1</sup> @ 0.7 mA/cm <sup>2</sup>      | 99/5000                            | [22]    |
| ZnO/Co <sub>3</sub> O <sub>4</sub> -450//AC                    | Asymmetric | 1.0 M KOH                           | 153 F g <sup>-1</sup> @ 1 A.g <sup>-1</sup>         | -                                  | [23]    |
| CC@NiC <sub>2</sub> O <sub>4</sub> //CC@NC                     | Asymmetric | 6.0 M KOH                           | 89.7 F g <sup>-1</sup> @ 1 A g <sup>-1</sup>        | 86.7/20000                         | [24]    |
| Co <sub>3</sub> O <sub>4</sub> @Ni <sub>3</sub> S <sub>2</sub> | Asymmetric | 3.0 M KOH                           | 126 F g <sup>-1</sup> @ 1 A.g <sup>-1</sup>         | 83.5/5000                          | [25]    |
| Ag/NiO                                                         | Asymmetric | 3.0 M KOH                           | 204 C.g <sup>-1</sup> @ 2.5 A.g <sup>-1</sup>       | 96/4000                            | [26]    |
| Co <sub>3</sub> O <sub>4</sub> @Ni(OH) <sub>2</sub> //AC       | Asymmetric | 6.0 M KOH                           | 110 F.g <sup>-1</sup> @ 2.5 A.g <sup>-1</sup>       | 86/1000                            | [27]    |
| 3D graphene-MoS <sub>2</sub> hybrid                            | Symmetric  | KOH/PVA                             | 58.0F.g <sup>-1</sup> @ 2 A.g <sup>-1</sup>         | -                                  | [28]    |
| TaS <sub>2</sub>                                               | Symmetric  | PVA/LiCl                            | 508 F/cm <sup>3</sup> @ 10 mV/s                     | 92/4000                            | [29]    |
| Cu <sub>2</sub> WS <sub>4</sub>                                | Symmetric  | PVA/LiCl                            | 583.3 F cm <sup>-3</sup> @ 0.31 A cm <sup>-3</sup>  | 95/3000                            | [30]    |
| MoS <sub>2</sub> -NH <sub>2</sub> /PANI nanosheets             | Symmetric  | 1 M H <sub>2</sub> SO <sub>4</sub>  | 58.6 F g <sup>-1</sup> @ 2 A.g <sup>-1</sup>        | 96.5/10000                         | [31]    |
| MoS <sub>2</sub> /CNS                                          | Symmetric  | 1 M Na <sub>2</sub> SO <sub>4</sub> | 108 F g <sup>-1</sup> @ 1 A.g <sup>-1</sup>         | -                                  | [32]    |
| MoS <sub>2</sub> /G nanobelts                                  | Symmetric  | 1 M Na <sub>2</sub> SO <sub>4</sub> | 278.2 F.g <sup>-1</sup> @ 0.8 A.g <sup>-1</sup>     | -                                  | [33]    |

|                                             |            |                                          |                                                         |            |      |
|---------------------------------------------|------------|------------------------------------------|---------------------------------------------------------|------------|------|
| MoS <sub>2</sub> /rGO                       | Symmetric  | 1 M<br>H <sub>2</sub> SO <sub>4</sub>    | 306 F.g <sup>-1</sup> @<br>0.5 A.g <sup>-1</sup>        | -          | [34] |
| NiS/MoS <sub>2</sub> @N-rGO                 | Symmetric  | 6 M<br>KOH                               | 1028 F.g <sup>-1</sup><br>@1 A.g <sup>-1</sup>          | 94.5/50000 | [35] |
| VSL-MoS <sub>2</sub> @3D-Ni foam            | Symmetric  | Na <sub>2</sub> SO <sub>4</sub> /<br>PVA | 34.1 F.g <sup>-1</sup> @<br>1.3 A.g <sup>-1</sup>       | 82.5/10000 | [36] |
| MoS <sub>2</sub> /rGO                       | Symmetric  | NaOH                                     | 323 F.g <sup>-1</sup> @<br>0.2 A.g <sup>-1</sup>        | 76.8/500   | [37] |
| SS/MWCNTs/<br>MoTe <sub>2</sub>             | Symmetric  | PVA-<br>LiClO <sub>4</sub>               | 68.01 F.g <sup>-1</sup><br>@ 0.2<br>mA.cm <sup>-2</sup> | 94/2000    | [38] |
| MWCNTs/MoSe <sub>2</sub>                    | Symmetric  | PVA-<br>KOH                              | 27 F.g <sup>-1</sup> @<br>0.4 A/g                       | 95/1000    | [39] |
| MoS <sub>2</sub> /carbon cloth              | Symmetric  | PVA-<br>LiClO <sub>4</sub>               | 368 F.g <sup>-1</sup> @<br>5 mV/s                       | 96.5/5000  | [40] |
| MoS <sub>2</sub> /NPG                       | Symmetric  | 1 M<br>Na <sub>2</sub> SO <sub>4</sub>   | 102.5 F g <sup>-1</sup><br>@ 1 A g <sup>-1</sup>        | 91.67/5000 | [41] |
| (Ni,Co) <sub>0.85</sub> Se//porous graphene | Asymmetric | 1.0 M<br>KOH                             | 529.3 mF c<br>m <sup>-2</sup> @<br>1A g <sup>-1</sup>   | 85/10000   | [42] |
| MoS <sub>2</sub> /PEI-GO                    | Asymmetric | Na <sub>2</sub> SO <sub>4</sub>          | 42.9 @<br>0.5 A g <sup>-1</sup>                         | 93.1/8000  | [43] |
| MoS <sub>2-x</sub> @CNTs/Ni                 | Asymmetric | 1 M<br>Na <sub>2</sub> SO <sub>4</sub>   | 153.1F g <sup>-1</sup><br>@ 1 A g <sup>-1</sup>         | 91/3000    | [44] |

## References

- [1] F. Tavakoli, B. Rezaei, A.R. Taghipour Jahromi, A.A. Ensafi, Facile Synthesis of Yolk-Shelled  $\text{CuCo}_2\text{Se}_4$  Microspheres as a Novel Electrode Material for Supercapacitor Application, *ACS Applied Materials & Interfaces* 12 (2019) 418-427.
- [2] D. Sun, L. He, R. Chen, Y. Liu, B. Lv, S. Lin, B. Lin, Biomorphic composites composed of octahedral  $\text{Co}_3\text{O}_4$  nanocrystals and mesoporous carbon microtubes templated from cotton for excellent supercapacitor electrodes, *Applied Surface Science* 465 (2019) 232-240.
- [3] G. Li, Z. Chang, T. Li, L. Ma, K. Wang, Hierarchical Mn-Co sulfide nanosheets on nickel foam by electrochemical co-deposition for high-performance pseudocapacitors, *Ionics* 25 (2019) 3885-3895.
- [4] F. Liao, X. Han, Y. Zhang, C. Xu, H. Chen, Solvothermal synthesis of porous  $\text{MnCo}_2\text{O}_{4.5}$  spindle-like microstructures as high-performance electrode materials for supercapacitors, *Ceramics International* 44 (2018) 22622-22631.
- [5] Z. Zhu, C. Han, T.-T. Li, Y. Hu, J. Qian, S. Huang, MOF-templated syntheses of porous  $\text{Co}_3\text{O}_4$  hollow spheres and micro-flowers for enhanced performance in supercapacitors, *CrystEngComm* 20 (2018) 3812-3816.
- [6] X. Hou, Y. Zhang, Q. Dong, Y. Hong, Y. Liu, W. Wang, J. Shao, W. Si, X. Dong, Metal organic framework derived core-shell structured  $\text{Co}_9\text{S}_8@ \text{N-C@MoS}_2$  nanocubes for supercapacitor, *ACS Applied Energy Materials* 1 (2018) 3513-3520.
- [7] R. Atchudan, T.N.J.I. Edison, D. Chakradhar, N. Karthik, S. Perumal, Y.R. Lee, One-pot dual product synthesis of hierarchical  $\text{Co}_3\text{O}_4@ \text{N-rGO}$  for supercapacitors, N-GDs for label-free detection of metal ion and bio-imaging applications, *Ceramics International* 44 (2018) 2869-2883.

- [8] P. Xu, W. Zeng, S. Luo, C. Ling, J. Xiao, A. Zhou, Y. Sun, K. Liao, 3D Ni-Co selenide nanorod array grown on carbon fiber paper: towards high-performance flexible supercapacitor electrode with new energy storage mechanism, *Electrochimica Acta* 241 (2017) 41-49.
- [9] Y. Zhang, H. Xuan, Y. Xu, B. Guo, H. Li, L. Kang, P. Han, D. Wang, Y. Du, One-step large scale combustion synthesis mesoporous MnO<sub>2</sub>/MnCo<sub>2</sub>O<sub>4</sub> composite as electrode material for high-performance supercapacitors, *Electrochimica Acta* 206 (2016) 278-290.
- [10] G. Sun, L. Ma, J. Ran, X. Shen, H. Tong, Incorporation of homogeneous Co<sub>3</sub>O<sub>4</sub> into a nitrogen-doped carbon aerogel via a facile in situ synthesis method: implications for high performance asymmetric supercapacitors, *Journal of Materials Chemistry A* 4 (2016) 9542-9554.
- [11] N.I. Chandrasekaran, H. Muthukumar, A.D. Sekar, A. Pugazhendhi, M.J.J.o.M.L. Manickam, High-performance asymmetric supercapacitor from nanostructured tin nickel sulfide (SnNi<sub>2</sub>S<sub>4</sub>) synthesized via microwave-assisted technique, 266 (2018) 649-657.
- [12] J.S. Lee, C. Lee, J. Jun, D.H. Shin, J. Jang, A metal-oxide nanofiber-decorated three-dimensional graphene hybrid nanostructured flexible electrode for high-capacity electrochemical capacitors, *Journal of Materials Chemistry A* 2 (2014) 11922-11929.
- [13] F. Zhu, M. Yan, Y. Liu, H. Shen, Y. Lei, W. Shi, Hexagonal prism-like hierarchical Co<sub>9</sub>S<sub>8</sub>@Ni(OH)<sub>2</sub> core-shell nanotubes on carbon fibers for high-performance asymmetric supercapacitors, *Journal of Materials Chemistry A* 5 (2017) 22782-22789.
- [14] Y. Liu, J. Zhou, W. Fu, P. Zhang, X. Pan, E. Xie, In situ synthesis of CoS<sub>x</sub>@carbon core-shell nanospheres decorated in carbon nanofibers for capacitor electrodes with superior rate and cycling performances, *Carbon* 114 (2017) 187-197.

- [15] H. Peng, G. Ma, K. Sun, Z. Zhang, J. Li, X. Zhou, Z. Lei, A novel aqueous asymmetric supercapacitor based on petal-like cobalt selenide nanosheets and nitrogen-doped porous carbon networks electrodes, *Journal of Power Sources* 297 (2015) 351-358.
- [16] M. Qorbani, T.-c. Chou, Y.-H. Lee, S. Samireddi, N. Naseri, A. Ganguly, A. Esfandiar, C.-H. Wang, L.-C. Chen, K.-H. Chen, Multi-porous  $\text{Co}_3\text{O}_4$  nanoflakes@ sponge-like few-layer partially reduced graphene oxide hybrids: towards highly stable asymmetric supercapacitors, *Journal of Materials Chemistry A* 5 (2017) 12569-12577.
- [17] J. Li, C. Zhao, Y. Yang, C. Li, T. Hollenkamp, N. Burke, Z.-Y. Hu, G. Van Tendeloo, W. Chen, Synthesis of monodispersed  $\text{CoMoO}_4$  nanoclusters on the ordered mesoporous carbons for environment-friendly supercapacitors, *Journal of Alloys and Compounds* 810 (2019) 151841.
- [18] Y. Wang, W. Zhang, X. Guo, K. Jin, Z. Chen, Y. Liu, L. Yin, L. Li, K. Yin, L. Sun, Ni-Co Selenide Nanosheet/3D Graphene/Nickel Foam Binder-Free Electrode for High-Performance Supercapacitor, *ACS applied materials & interfaces* 11 (2019) 7946-7953.
- [19] H. Fu, Y. Liu, L. Chen, Y. Shi, W. Kong, J. Hou, F. Yu, T. Wei, H. Wang, X. Guo, Designed formation of  $\text{NiCo}_2\text{O}_4$  with different morphologies self-assembled from nanoparticles for asymmetric supercapacitors and electrocatalysts for oxygen evolution reaction, *Electrochimica Acta* 296 (2019) 719-729.
- [20] P. Howli, S. Das, S. Sarkar, M. Samanta, K. Panigrahi, N.S. Das, K.K. Chattopadhyay,  $\text{Co}_3\text{O}_4$  nanowires on flexible carbon fabric as a binder-free electrode for all solid-state symmetric supercapacitor, *ACS omega* 2 (2017) 4216-4226.
- [21] X. Lu, X. Huang, S. Xie, T. Zhai, C. Wang, P. Zhang, M. Yu, W. Li, C. Liang, Y. Tong, Controllable synthesis of porous nickel-cobalt oxide nanosheets for supercapacitors, *Journal of Materials Chemistry* 22 (2012) 13357-13364.

- [22] K. Gao, Z. Shao, J. Li, X. Wang, X. Peng, W. Wang, F. Wang, Cellulose nanofiber–graphene all solid-state flexible supercapacitors, *Journal of Materials Chemistry A* 1 (2013) 63-67.
- [23] M. Gao, W.-K. Wang, Q. Rong, J. Jiang, Y.-J. Zhang, H.-Q. Yu, Porous ZnO-coated Co<sub>3</sub>O<sub>4</sub> nanorod as a high-energy-density supercapacitor material, *ACS applied materials & interfaces* 10 (2018) 23163-23173.
- [24] C. Guan, X. Liu, W. Ren, X. Li, C. Cheng, J. Wang, Rational design of metal-organic framework derived hollow NiCo<sub>2</sub>O<sub>4</sub> arrays for flexible supercapacitor and electrocatalysis, *Advanced Energy Materials* 7 (2017) 1602391.
- [25] J. Zhang, J. Lin, J. Wu, R. Xu, M. Lai, C. Gong, X. Chen, P. Zhou, Excellent electrochemical performance hierarchical Co<sub>3</sub>O<sub>4</sub>@Ni<sub>3</sub>S<sub>2</sub> core/shell nanowire arrays for asymmetric supercapacitors, *Electrochimica Acta* 207 (2016) 87-96.
- [26] S. Nagamuthu, K.-S. Ryu, Synthesis of Ag/NiO honeycomb structured nanoarrays as the electrode material for high performance asymmetric supercapacitor devices, *Scientific reports* 9 (2019) 1-11.
- [27] C.-h. Tang, X. Yin, H. Gong, Superior performance asymmetric supercapacitors based on a directly grown commercial mass 3D Co<sub>3</sub>O<sub>4</sub>@Ni(OH)<sub>2</sub> core–shell electrode, *ACS applied materials & interfaces* 5 (2013) 10574-10582.
- [28] K. Singh, S. Kumar, K. Agarwal, K. Soni, V.R. Gedela, K. Ghosh, Three-dimensional graphene with MoS<sub>2</sub> nanohybrid as potential energy storage/transfer device, *Scientific reports* 7 (2017) 1-12.
- [29] J. Wu, J. Peng, Z. Yu, Y. Zhou, Y. Guo, Z. Li, Y. Lin, K. Ruan, C. Wu, Y. Xie, Acid-assisted exfoliation toward metallic sub-nanopore TaS<sub>2</sub> monolayer with high volumetric capacitance, *Journal of the American Chemical Society* 140 (2018) 493-498.



- [30] X. Hu, W. Shao, X. Hang, X. Zhang, W. Zhu, Y. Xie, Superior Electrical Conductivity in Hydrogenated Layered Ternary Chalcogenide Nanosheets for Flexible All-Solid-State Supercapacitors, *Angewandte Chemie International Edition* 55 (2016) 5733-5738.
- [31] R. Zeng, Z. Li, L. Li, Y. Li, J. Huang, Y. Xiao, K. Yuan, Y. Chen, Covalent connection of polyaniline with MoS<sub>2</sub> nanosheets toward ultrahigh rate capability supercapacitors, *ACS Sustainable Chemistry & Engineering* 7 (2019) 11540-11549.
- [32] T.N. Khawula, K. Raju, P.J. Franklyn, I. Sigalas, K.I. Ozoemena, Symmetric pseudocapacitors based on molybdenum disulfide (MoS<sub>2</sub>)-modified carbon nanospheres: correlating physicochemistry and synergistic interaction on energy storage, *Journal of Materials Chemistry A* 4 (2016) 6411-6425.
- [33] Y. Jia, H. Wan, L. Chen, H. Zhou, J. Chen, Hierarchical nanosheet-based MoS<sub>2</sub>/graphene nanobelts with high electrochemical energy storage performance, *Journal of Power Sources* 354 (2017) 1-9.
- [34] H. Ji, S. Hu, Z. Jiang, S. Shi, W. Hou, G. Yang, Directly scalable preparation of sandwiched MoS<sub>2</sub>/graphene nanocomposites via ball-milling with excellent electrochemical energy storage performance, *Electrochimica Acta* 299 (2019) 143-151.
- [35] X. Xu, W. Zhong, X. Zhang, J. Dou, Z. Xiong, Y. Sun, T. Wang, Y. Du, Flexible symmetric supercapacitor with ultrahigh energy density based on NiS/MoS<sub>2</sub>@N-rGO hybrids electrode, *Journal of colloid and interface science* 543 (2019) 147-155.
- [36] R.K. Mishra, A.K. Kushwaha, S. Kim, S.G. Seo, S.H. Jin, Vertical-slate-like MoS<sub>2</sub> nanostructures on 3D-Ni-foam for binder-free, low-cost, and scalable solid-state symmetric supercapacitors, *Current Applied Physics* 19 (2019) 1-7.

- [37] T. Xue, Y. Yang, X.-H. Yan, Z.-L. Zou, F. Han, Z. Yang, Free-standing and binder-free Molybdenum bisulfide nanospheres/reduced graphene oxide composite paper as flexible electrode for symmetric supercapacitor, *Materials Research Express* 6 (2019) 095029.
- [38] S.S. Karade, B.R. Sankapal, Materials Mutualism through EDLC-Behaved MWCNTs with Pseudocapacitive MoTe<sub>2</sub> Nanopbbles: Enhanced Supercapacitive Performance, *ACS Sustainable Chemistry & Engineering* 6 (2018) 15072-15082.
- [39] S.S. Karade, B.R. Sankapal, Two dimensional cryptomelane like growth of MoS<sub>2</sub> over MWCNTs: Symmetric all-solid-state supercapacitor, *Journal of Electroanalytical Chemistry* 802 (2017) 131-138.
- [40] M.S. Javed, S. Dai, M. Wang, D. Guo, L. Chen, X. Wang, C. Hu, Y. Xi, High performance solid state flexible supercapacitor based on molybdenum sulfide hierarchical nanospheres, *Journal of Power Sources* 285 (2015) 63-69.
- [41] S. Zhao, W. Xu, Z. Yang, X. Zhang, Q. Zhang, One-pot hydrothermal synthesis of nitrogen and phosphorus Co-doped graphene decorated with flower-like molybdenum sulfide for enhanced supercapacitor performance, *Electrochimica Acta* 331 (2020) 135265.
- [42] C. Xia, Q. Jiang, C. Zhao, P.M. Beaujuge, H.N. Alshareef, Asymmetric supercapacitors with metal-like ternary selenides and porous graphene electrodes, *Nano Energy* 24 (2016) 78-86.
- [43] M.-C. Liu, Y. Xu, Y.-X. Hu, Q.-Q. Yang, L.-B. Kong, W.-W. Liu, W.-J. Niu, Y.-L. Chueh, Electrostatically Charged MoS<sub>2</sub>/Graphene Oxide Hybrid Composites for Excellent Electrochemical Energy Storage Devices, *ACS Applied Materials & Interfaces* 10 (2018) 35571-35579.

- [44] P. Sun, R. Wang, Q. Wang, H. Wang, X. Wang, Uniform MoS<sub>2</sub> nanolayer with sulfur vacancy on carbon nanotube networks as binder-free electrodes for asymmetrical supercapacitor, *Applied Surface Science* 475 (2019) 793-802.
